# Supplementary material
Source: PubMed Central journal article supplement (PMC7298298)

**Figure 1**

**c**

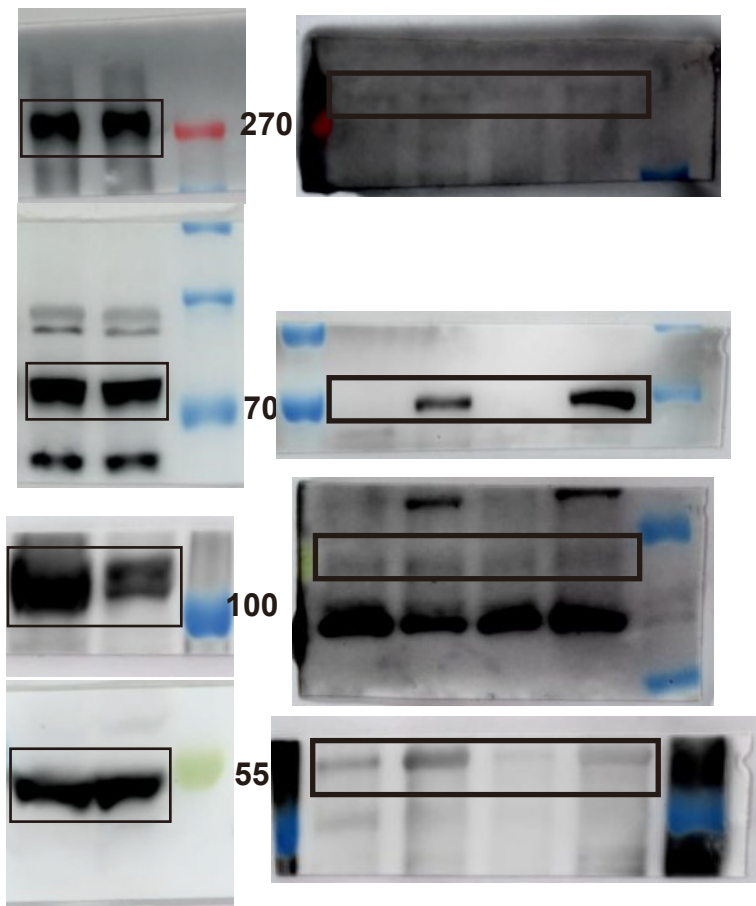

**d**

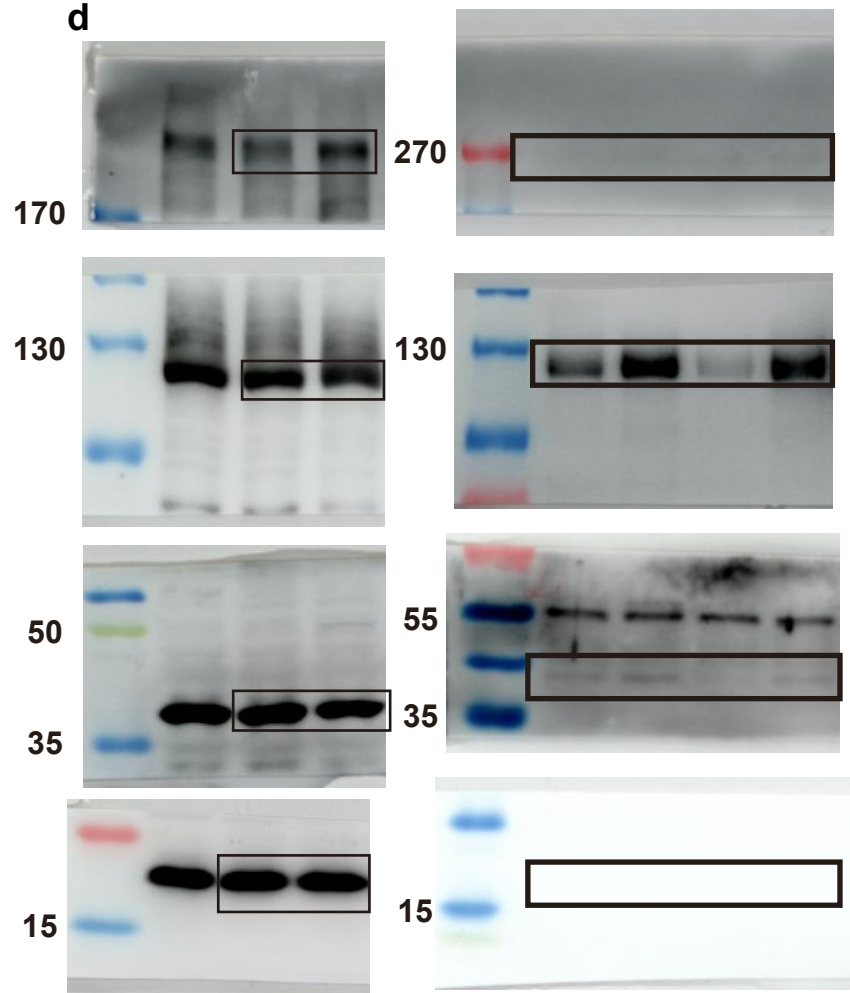

**f**

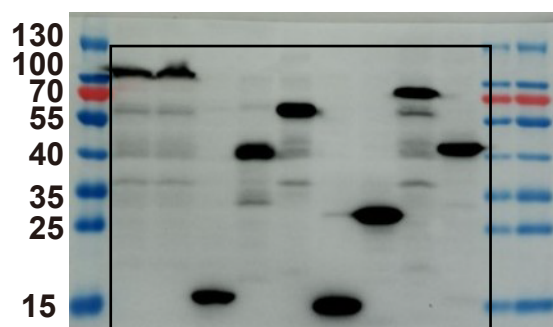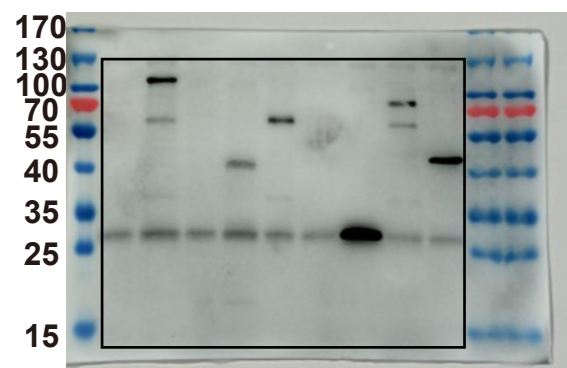

**h**

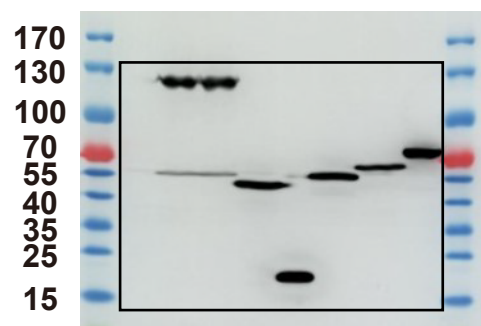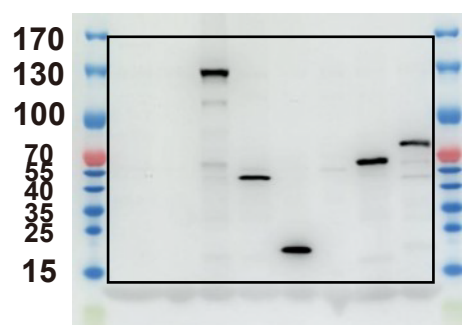

Supplement: EMBJ-39-e104133-s005.pdf [file EMBJ-39-e104133-s005.pdf]

Figure 2

B

siCTRL

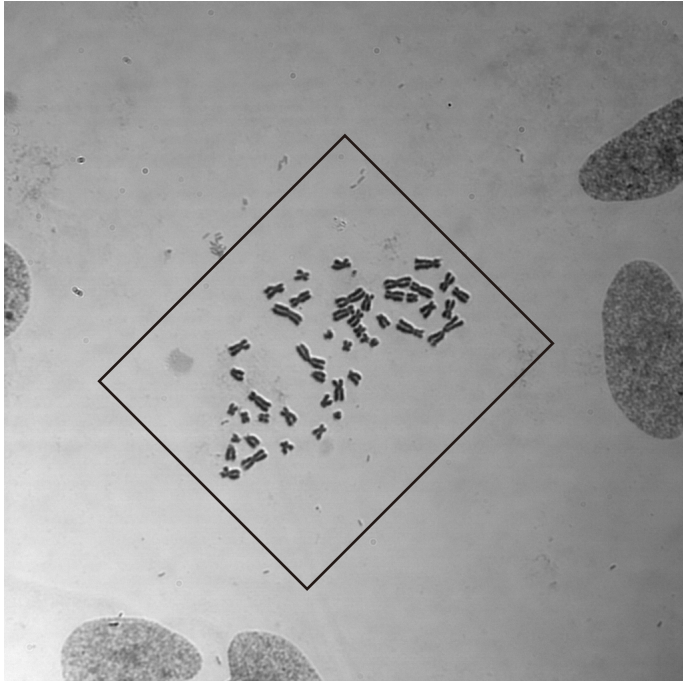

siBGL3

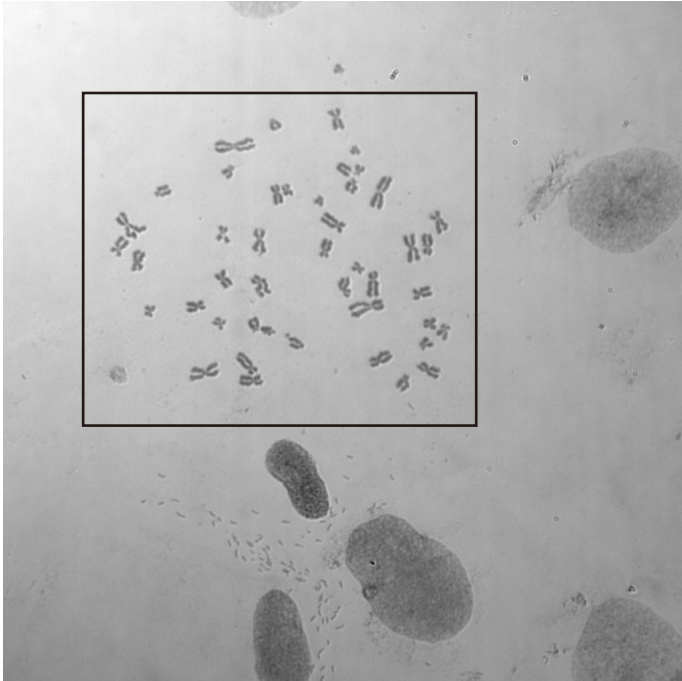

C

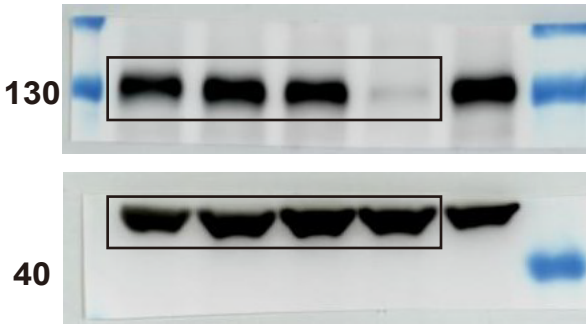

Supplement: EMBJ-39-e104133-s006.pdf [file EMBJ-39-e104133-s006.pdf]

Figure 4

E

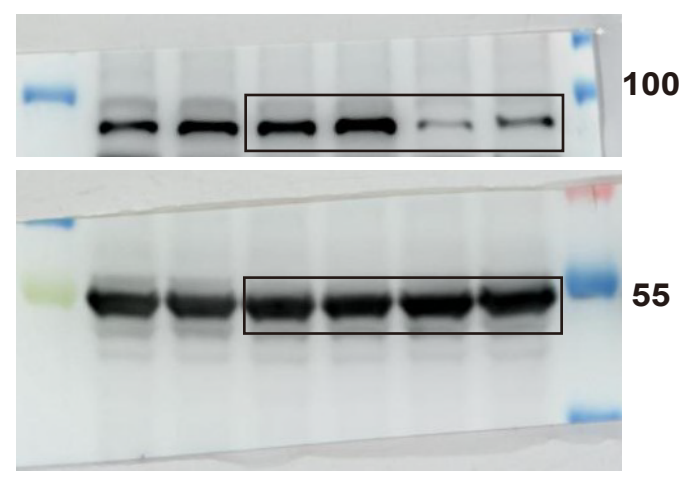

Supplement: EMBJ-39-e104133-s007.pdf [file EMBJ-39-e104133-s007.pdf]

Figure 5

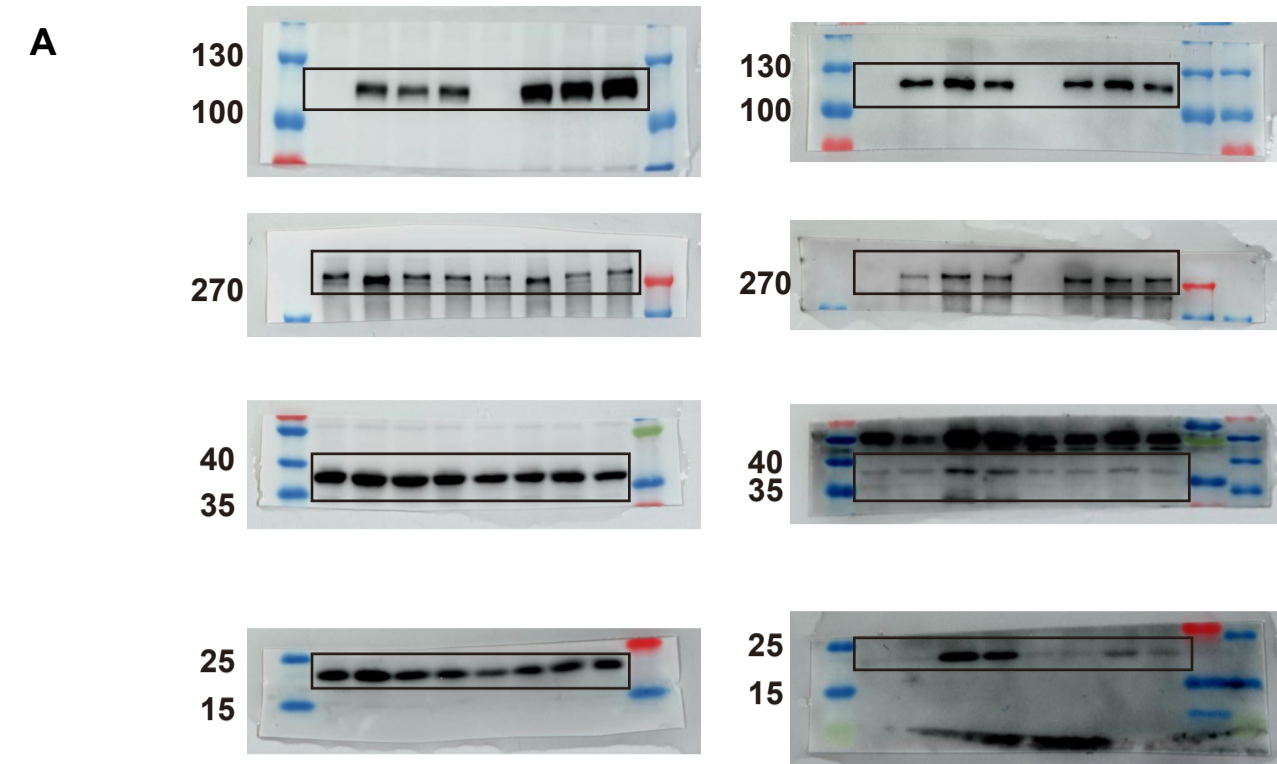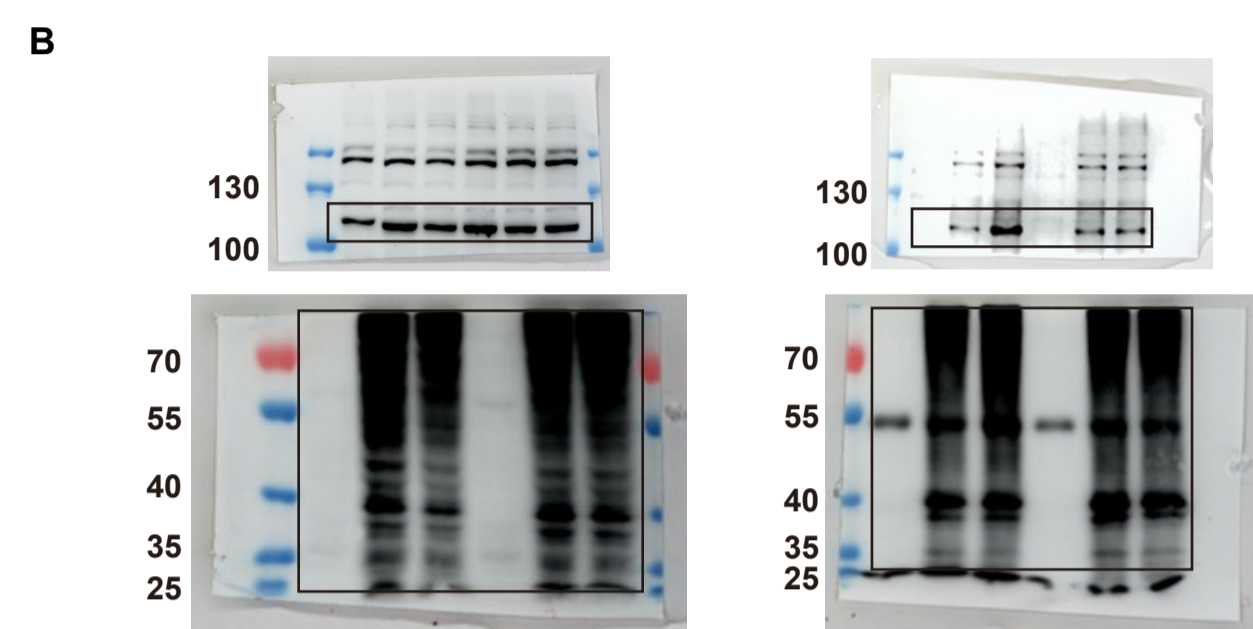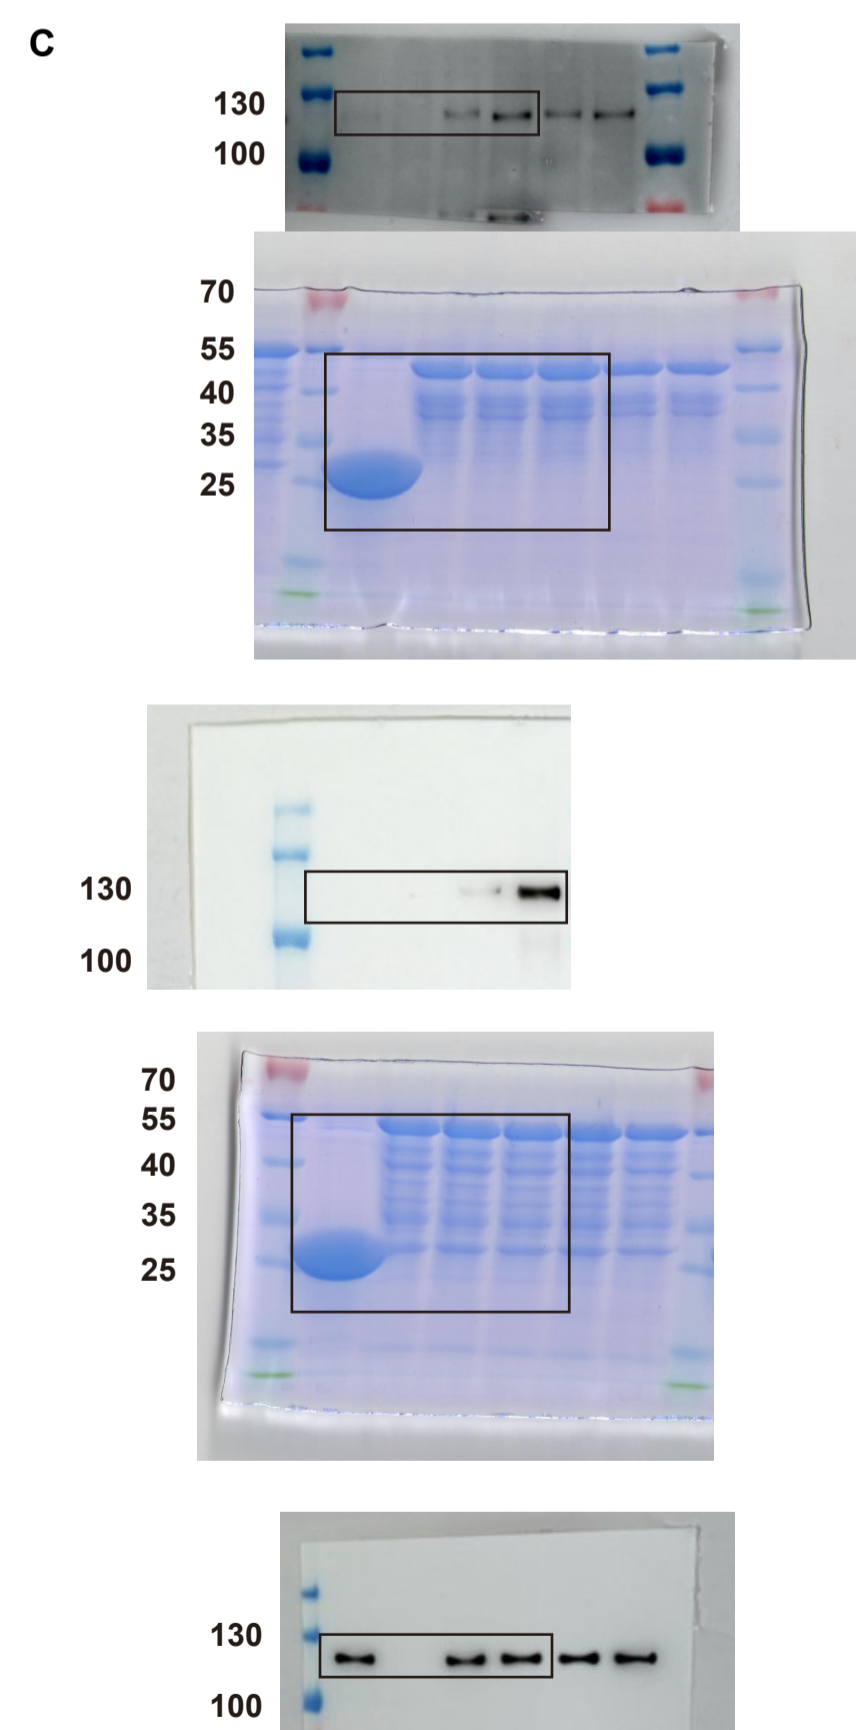

Supplement: EMBJ-39-e104133-s008.pdf [file EMBJ-39-e104133-s008.pdf]
